# Supplementary material for: Interactions and reactivity in crystalline intermediates of mechanochemical cyclorhodation reactions
Source: Royal Society of Chemistry journal article supplement (doi:10.1039/d3cp04201d), 2023-12-08
Supplement: d3cp04201d1.pdf [file d3cp04201d1.pdf]

# Interactions and Reactivity in Crystalline Intermediates of Mechanochemical Cyclorhodation Reactions

Sara Gómez,<sup>a</sup> Santiago Gómez,<sup>b</sup> Natalia Rojas-Valencia,<sup>b</sup> José G. Hernández,<sup>b</sup> Karen J. Ardila-Fierro,<sup>b</sup> Tatiana Gómez,<sup>c</sup> Carlos Cárdenas,<sup>d,e</sup> Cacier Hadad,<sup>b</sup> Chiara Cappelli,<sup>a</sup> and Albeiro Restrepo<sup>b</sup>

<sup>a</sup>*Scuola Normale Superiore, Classe di Scienze, Piazza dei Cavalieri 7, 56126, Pisa, Italy*

<sup>b</sup>*Instituto de Química, Universidad de Antioquia UdeA, Calle 70 No. 52-21, Medellín, Colombia*

<sup>c</sup>*Theoretical and Computational Chemistry Center, Institute of Applied Chemical Sciences, Faculty of Engineering, Universidad Autónoma de Chile, El Llano Subercaceaux, 2801, Santiago, Chile*

<sup>d</sup>*Departamento de Física, Facultad de Ciencias, Universidad de Chile, Casilla 653, Santiago, Chile*

<sup>e</sup>*Centro para el desarrollo de las Nanociencias y Nanotecnología, CEDENNA, Av. Ecuador 3493 Santiago, Chile*

Correspondence: sara.gomezmaya@sns.it, albeiro.restrepo@udea.edu.co

## Supplementary information

### Contents

Rh Dimer, **1**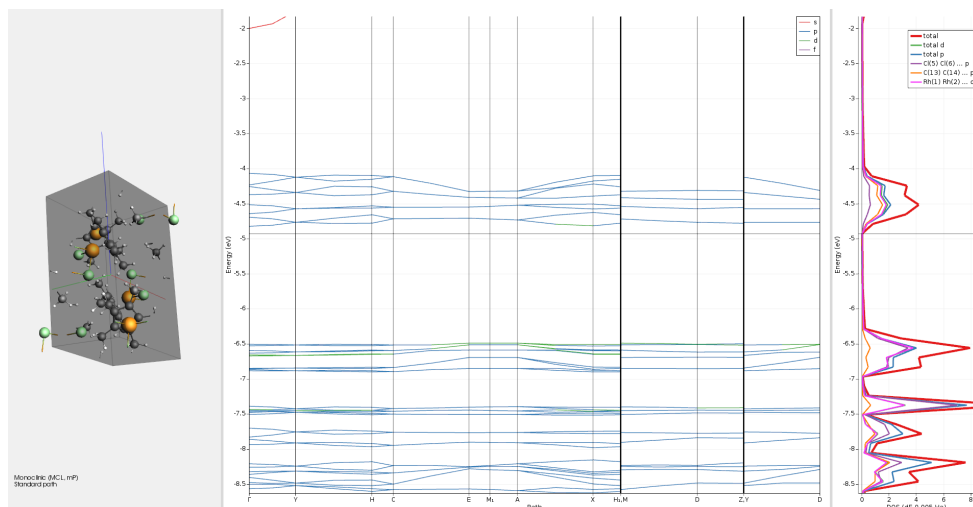**4 $\alpha$** 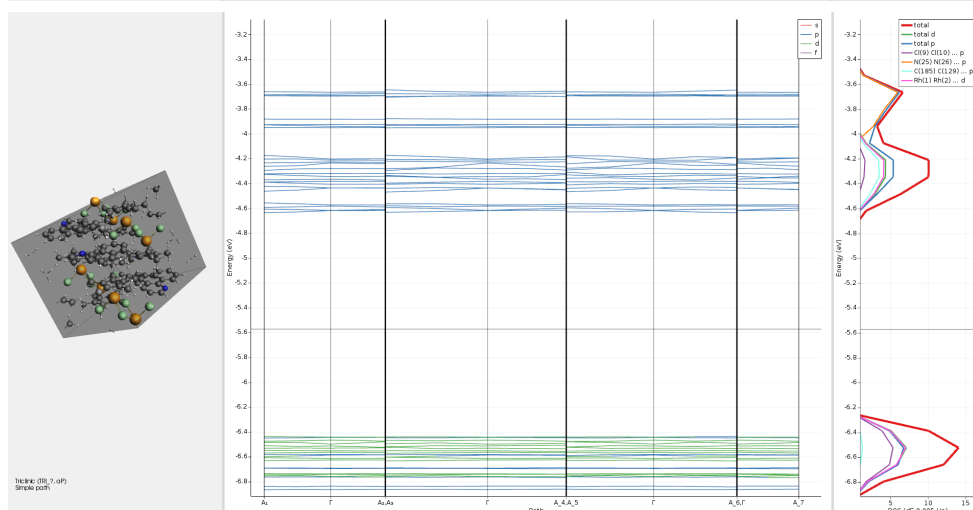**4 $\beta$** 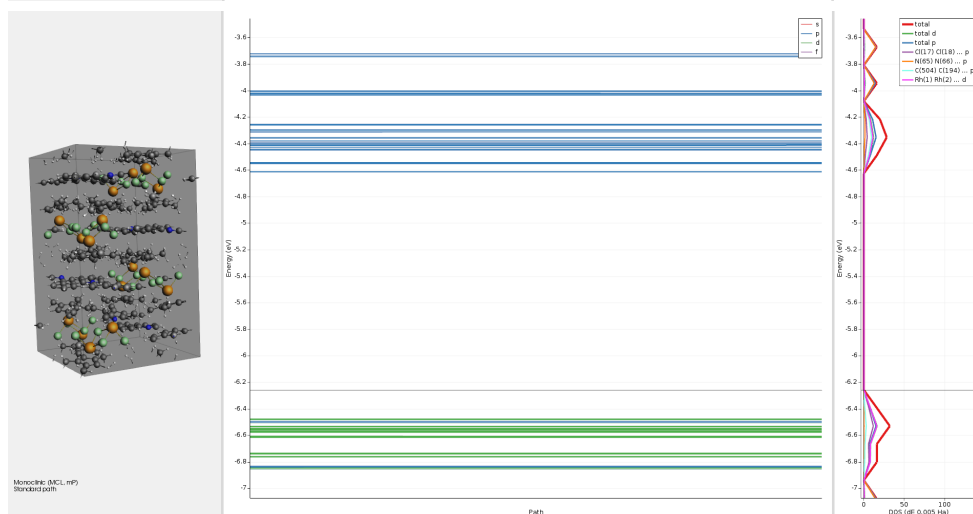

Figure S1: Band structure and Density of states (DOS) of the rhodium dimer, **1** (top), **4 $\alpha$**  (middle) and **4 $\beta$**  (bottom) with their corresponding dominant character. The Fermi level is plotted as a horizontal gray line in all the cases. All calculations using the AMS-BAND program[1]

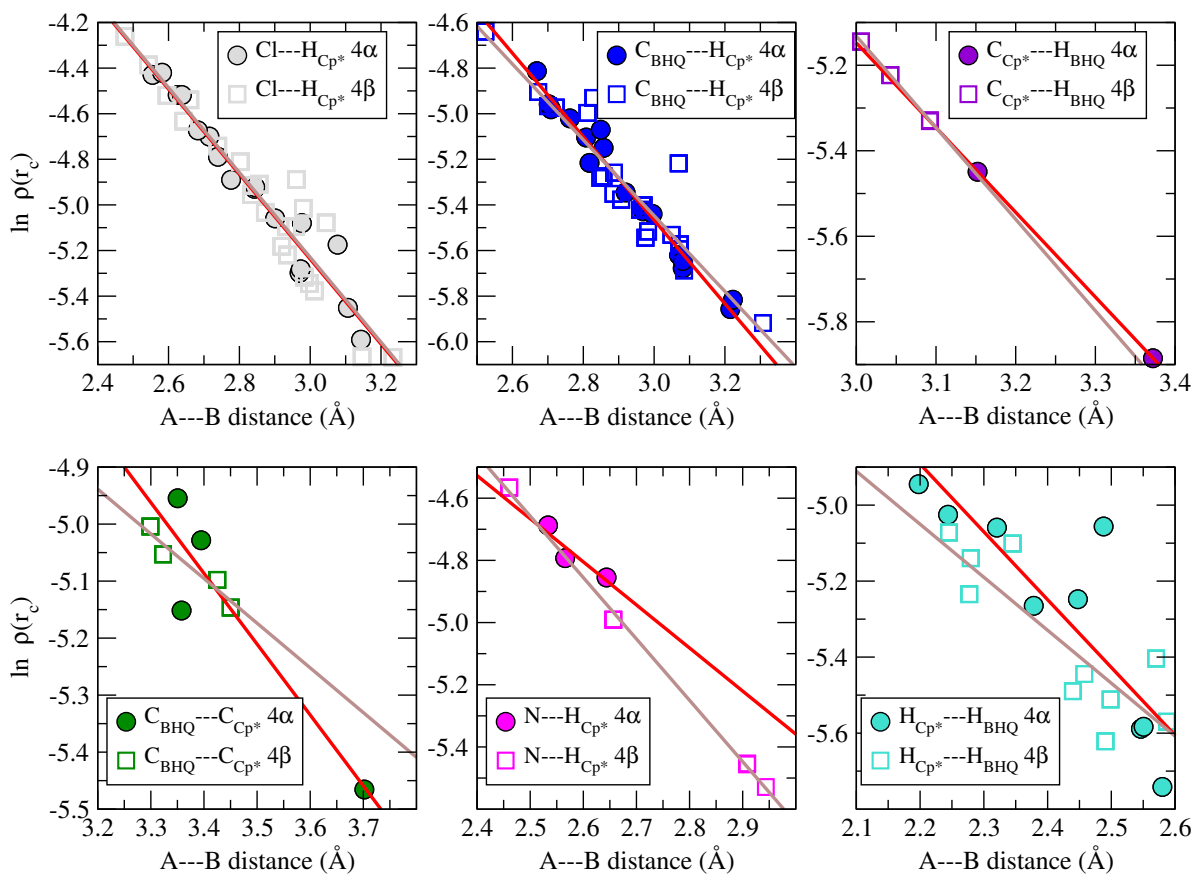

Figure S2: Logarithmic relationships for  $[\mathbf{r}, \rho(\mathbf{r}_c)]$ ,  $\mathbf{r}$  being the length of the contacts in the subsets of the Cl $\cdots$ H, C $\cdots$ H, C $\cdots$ C, N $\cdots$ H and H $\cdots$ H interactions found with the topological QTAIM analysis (see Table 4 in the main text). Linear regression for  $4\alpha$  in red, for  $4\beta$  in brown.

## References

- [1] P. Philipson, G. te Velde, E. Baerends, J. Berger, P. de Boeij, M. Franchini, J. Groeneveld, E. Kadantsev, R. Klooster, F. Kootstra, M. Pols, P. Romaniello, M. Raupach, D. Skachkov, J. Snijders, C. Verzijl, J. Celis Gil, J. M. Thijssen, G. Wiesenekker, C. A. Peeples, G. Schreckenbach, and T. Ziegler, “Band (*version 2022.102*), software for chemistry & materials, scm,” 2022. Theoretical Chemistry, Vrije Universiteit, Amsterdam, The Netherlands.
